# Supplementary material for: Identifying the druggable interactome of EWS-FLI1 reveals MCL-1 dependent differential sensitivities of Ewing sarcoma cells to apoptosis inducers
Source: PubMed Central journal article supplement (PMC6089552; doi:10.18632/oncotarget.25760), 2018-07-24
Supplement: oncotarget-09-31018-s001.pdf [file oncotarget-09-31018-s001.pdf]

# Identifying the druggable interactome of EWS-FLI1 reveals MCL-1 dependent differential sensitivities of Ewing sarcoma cells to apoptosis inducers

## SUPPLEMENTARY MATERIALS

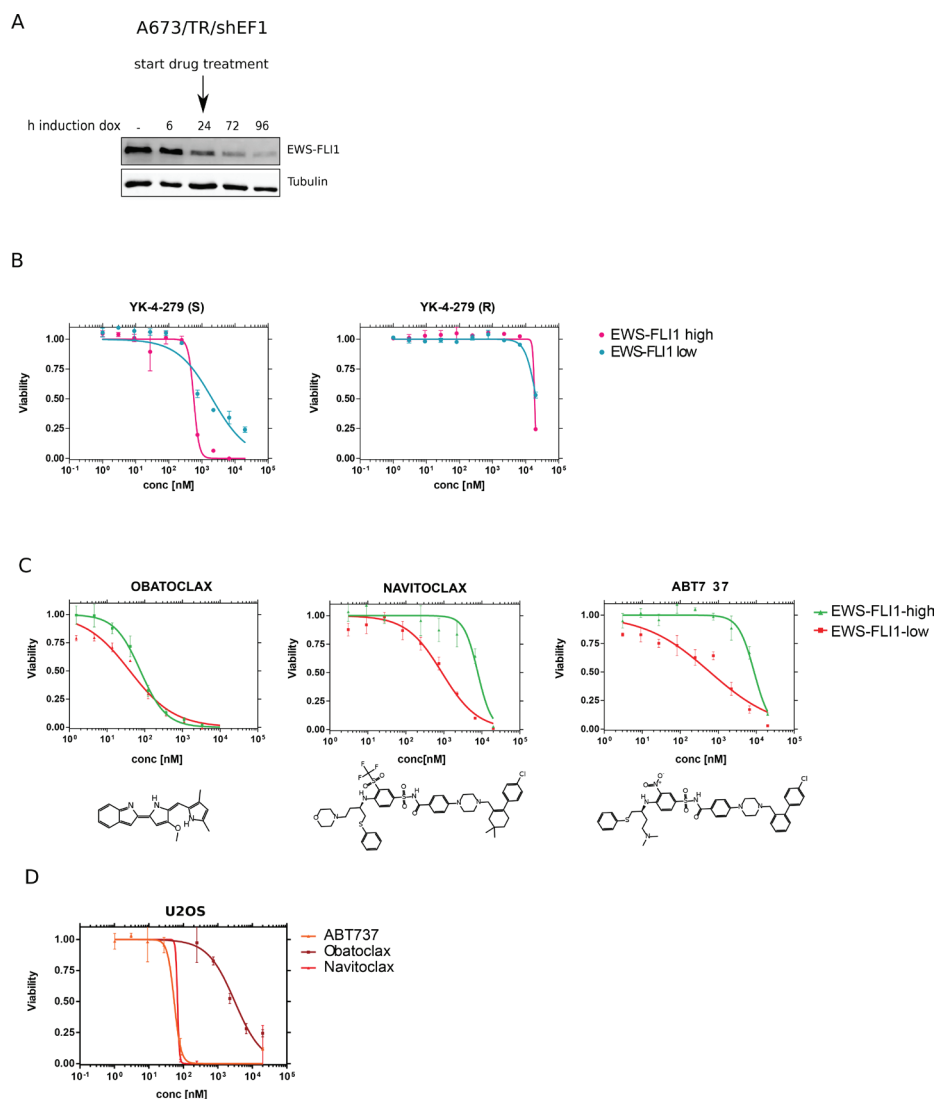

**Supplementary Figure 1: Efficacy of YK-2-479, obatoclox, navitoclox in EWS-FLI1-high and -low conditions.** (A) Immunoblot showing EWS-FLI1 knockdown efficacy. Drug treatments was started 24 h post dox treatment for 72 h (total dox treatment time: 96 h). (B) Dose response curves of A673/TR/sh cells to YK-2-479 S- (active) and R- (inactive) enantiomers under EWS-FLI1-high and -low conditions. Only the S enantiomer showed efficacy, which was significantly higher in EWS-FLI1-high than -low state. (C) Dose response curves of obatoclox, navitoclox and ABT-737 in EWS-FLI1 high and low conditions. Below the graph are the corresponding chemical structures. While navitoclox and ABT-737 show the same pattern, obatoclox behaved differently since no curve shift was observed upon the EWS-FLI1 knockdown. (D) Dose response curves of the three BCL-2 inhibitors in the osteosarcoma cell line U2OS. Obatoclox is notably less potent than the other two BCL-2 inhibitors, in contrast to ES cells.

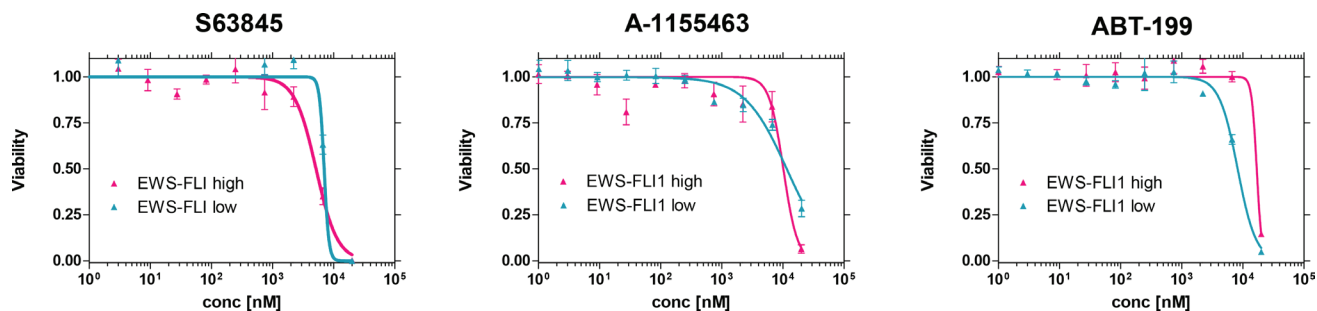

**Supplementary Figure 2: Pharmacologic inhibition of BCL-2 family members.** Dose response curves of MCL-1, BCL-(X)L and BCL-2 inhibitors (S63845, A-1155463 and ABT-199, respectively) in EWS-FLI1 high and low conditions. A673/TR/shEF cells were treated with drugs for 72 h and cell viability was measured using CellTiter-Glo assay. Curves were fitted according to non-linear regression four-parameter equation in GraphPad Prism.

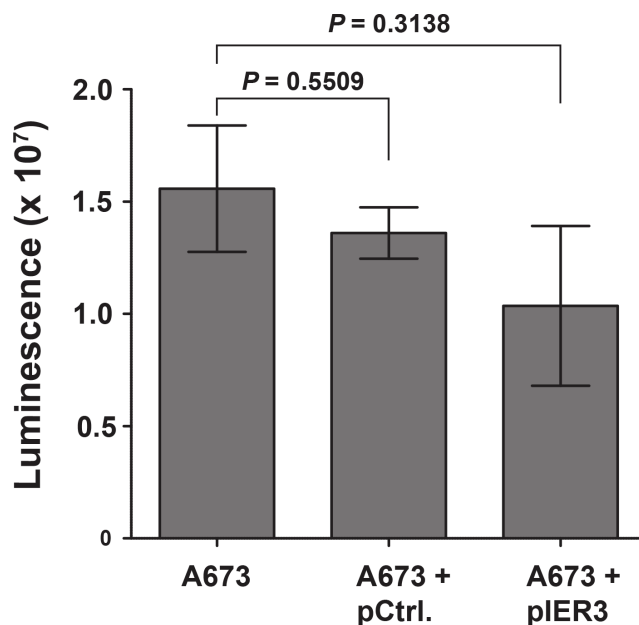

**Supplementary Figure 3: Gain of navitoclax sensitivity upon ectopic expression of IER3 in A673/TR/shEF cells.** A673/TR/shEF cells were treated with Navitoclax (3,5  $\mu$ M) and cellular viability (normalized to DMSO control) was measured after 48 h using CellTiter-Glo luminescent cell viability assay. The data are the average of three independent experiments (each performed in triplicates) and are mean  $\pm$  SD.

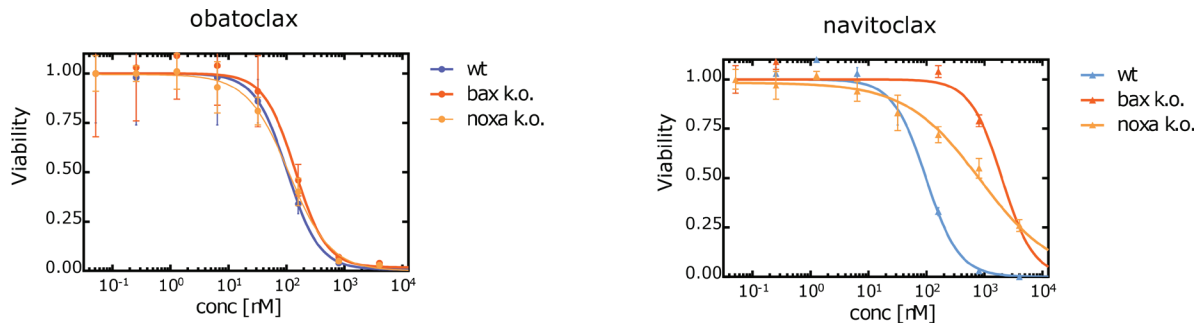

**Supplementary Figure 4: Dose response curves of obatoclax and navitoclax in haploid knockout KBM7 clones for BH3-only protein NOXA and membrane permeabilizing proteins BAX, necessary for the intrinsic apoptosis pathway regulated by BCL-2 proteins.** Observed are notable shifts in dose response curves of navitoclax, arguing for a classical BCL-2 inhibitor profile. No changes with obatoclax compared to the wild type KBM7 cells.

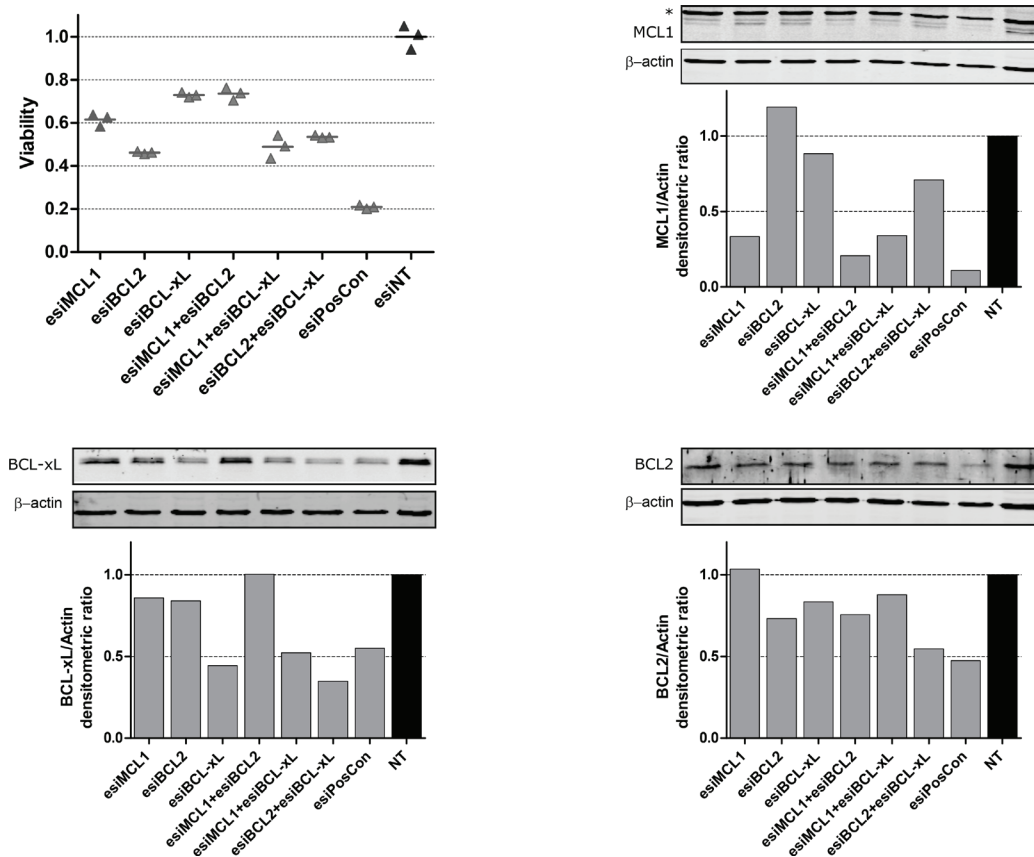

**Supplementary Figure 5: Genetic inhibition of BCL2 family members individually and in pairwise combinations.** esiRNA mediated knockdown of MCL-1, BCL-(X)L and BCL-2 in A673/TR/shEF cells. Results are normalized to non-targeting control and one-way ANOVA and Dunnett's multiple comparison test were applied to test for decrease in viability, which showed significance in all tested conditions. Western blots for MCL-1, BCL-(X)L and BCL-2 are shown together with quantification plots.

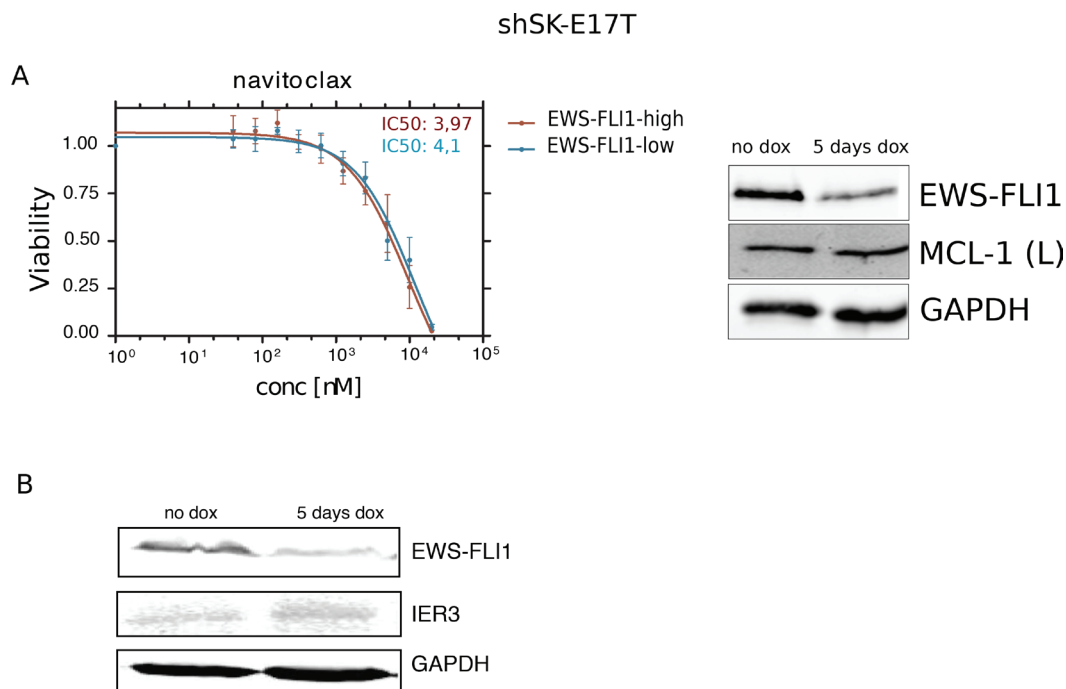

**Supplementary Figure 6: Navitoclax dose response and MCL-1 expression of shSK-E17T cells in response to EWS-FLI1 modulation.** (A) Left: dose response curves in control (IC<sub>50</sub>: 3,97 uM) and EWS-FLI1 knockdown (IC<sub>50</sub>: 4,1 uM) shSK-E17T (SK-N-MC) EwS cells. Right: Immunoblot showing knockdown efficacy of EWS-FLI1 in shSKE17T. EWS-FLI1 knockdown was induced by dox treatment 48 h before start of NVX treatment for 72 h (total dox treatment time: 5 days). (B) Immunoblot of EWS-FLI1 knockdown in shSK-E17T cells showing IER3 protein expression.

**Supplementary Table 1: The complete list of the 3325 compounds tested, screen annotation and the respective cell viabilities measured.** See Supplementary\_Table\_1

**Supplementary Table 2: Annotation of compounds tested.** See Supplementary\_Table\_2

**Supplementary Table 3: Compounds and reported targets.** See Supplementary\_Table\_3

**Supplementary Table 4: List of compound hits upon EWS-FLI1 presence or absence.** See Supplementary\_Table\_4

**Supplementary Table 5: Exclusive and enriched targets of the compound hit list.** See Supplementary\_Table\_5

**Supplementary Table 6: Biological process, Molecular Function and Pathway Enrichment.** See Supplementary\_Table\_6
